## CORRECTION

# Correction: Experimental evidence that physical activity affects the multivariate associations among muscle attachments (entheses) (doi:10.1242/jeb.213058)

**Fotios Alexandros Karakostis, Ian J. Wallace, Nicolai Konow and Katerina Harvati**

There was an error published in *J. Exp. Biol.* (2019) **222**, jeb213058 (doi:10.1242/jeb.213058).

In Materials and Methods, 'Experimental design', the number of strides was incorrectly shown as  $137.087 \pm 9.929$  (mean  $\pm$  s.d.). The correct value is  $137,087 \pm 9929$  (mean  $\pm$  s.d.).

Both the online full-text and PDF versions have been updated.

We apologise to the authors and readers for any inconvenience this may have caused.
